# Supplementary material for: Implementation of MALDI-TOF Mass Spectrometry and Peak Analysis: Application to the Discrimination of <em>Cryptococcus</em> Species and Their Interspecies Hybrids
Source: Preprints.org preprint supplement (doi:10.20944/preprints202007.0423.v1), 2020-07-19
Supplement: Supplementary file 1 [file supplementary]

|                      |                                                                                                                                               |
|----------------------|-----------------------------------------------------------------------------------------------------------------------------------------------|
| Baseline Subtraction | Tophat filter<br>Factor: 0.02                                                                                                                 |
| Noise Reduction      | Savitzky-Golay filter<br>-Window length: 11<br>-Polynomial order: 3                                                                           |
| Alignment            | Allowed shift: Medium<br>Mass tolerance for aligning the spectra:<br>-Linear Mass tolerance: 2000 ppm                                         |
| Peaks Finding        | By threshold<br>-Peak threshold: 0.01<br>-Constant Mass tolerance: 0.5Da<br>-Linear Mass tolerance: 2000ppm<br>-Analysis Data: Peak intensity |

Table S1. Pre-treatment of raw data spectra for the biomarkers search.

|                      |                                                                                                             |
|----------------------|-------------------------------------------------------------------------------------------------------------|
| Baseline Subtraction | Tophat filter<br>Factor: 0.02                                                                               |
| Noise Reduction      | Savitzky-Golay filter<br>-Window length: 11<br>-Polynomial order: 3                                         |
| Alignment            | Allowed shift: Medium<br>Mass tolerance for aligning the spectra:<br>-Linear Mass tolerance: 2000 ppm       |
| Peaks Finding        | By mass position<br>-Constant Mass tolerance: 0.5Da<br>-Linear Mass tolerance: 2000ppm                      |
| Merge                | Mass tolerance for aligning the peaks<br>- Constant Mass tolerance: 1Da<br>- Linear Mass tolerance: 2000ppm |
| Normalization        | -Total Ion Count (TIC)                                                                                      |

Table S2. Parameters applied for the construction of the peak matrix.

A

Score: 100 %

PC 0 (46.73%)

| Actual / Predicted | Deneoformans | Hybrid/Neoformans | % Correct |
|--------------------|--------------|-------------------|-----------|
| Deneoformans       | 7            | 0                 | 100 %     |
| Hybrid/Neoformans  | 0            | 58                | 100 %     |
|                    | 100 %        | 100 %             | 100 %     |

Confusion Matrix

k-fold Cross Validation

10-fold cross validation

| Actual / Predicted | Deneoformans | Hybrid/Neoformans | % Correct |
|--------------------|--------------|-------------------|-----------|
| Deneoformans       | 7            | 0                 | 100 %     |
| Hybrid/Neoformans  | 0            | 58                | 100 %     |
|                    | 100 %        | 100 %             | 100 %     |

Confusion Matrix

B

Score: 98.46 %

| From / to            | Deneoformans | Interspecies hybrids | Neoformans | % Correct |
|----------------------|--------------|----------------------|------------|-----------|
| Deneoformans         | 7            | 0                    | 0          | 100 %     |
| Interspecies hybrids | 0            | 23                   | 1          | 95.83 %   |
| Neoformans           | 0            | 0                    | 34         | 100 %     |
|                      |              |                      |            | 98.46 %   |

Confusion Matrix

k-fold Cross Validation

10-fold cross validation

| From / to            | Deneoformans | Interspecies hybrids | Neoformans | % Correct |
|----------------------|--------------|----------------------|------------|-----------|
| Deneoformans         | 6            | 1                    | 0          | 85.71 %   |
| Interspecies hybrids | 0            | 23                   | 1          | 95.83 %   |
| Neoformans           | 0            | 0                    | 34         | 100 %     |
|                      |              |                      |            | 96.92 %   |

Confusion Matrix

Table S3. Score and validation of (A) the SVM analysis applied to the two-step model with 5 biomarkers and (B) PLS-DA applied to the one-step model with 5 biomarkers. K=10
