# Supplementary material for: Implementation of MALDI-TOF Mass Spectrometry and Peak Analysis: Application to the Discrimination of <em>Cryptococcus</em> Species and Their Interspecies Hybrids
Source: Preprints.org preprint supplement (doi:10.20944/preprints202007.0423.v1), 2020-07-19
Supplement: Supplementary file 2 [file supplementary]

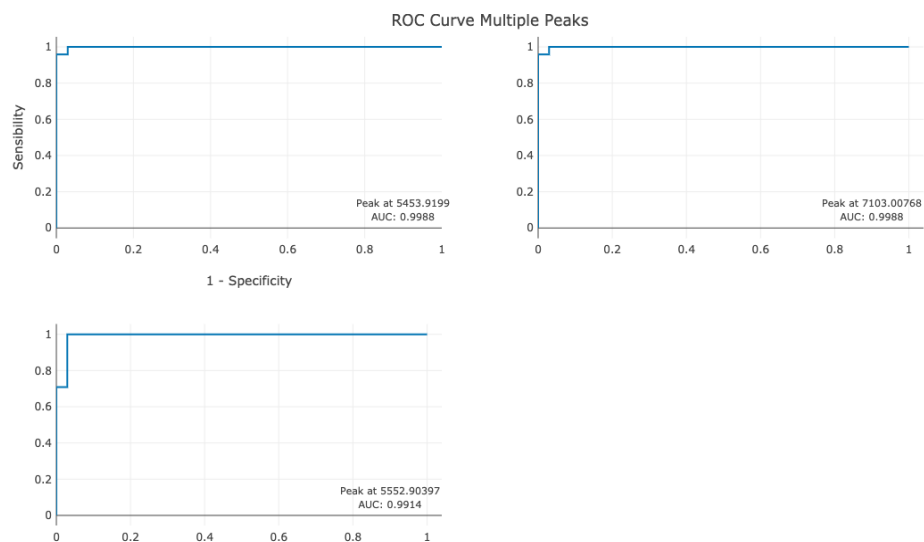

Figure S1. ROC Curve of MS peaks of *Cryptococcus* spp. according to the criteria for biomarkers search.

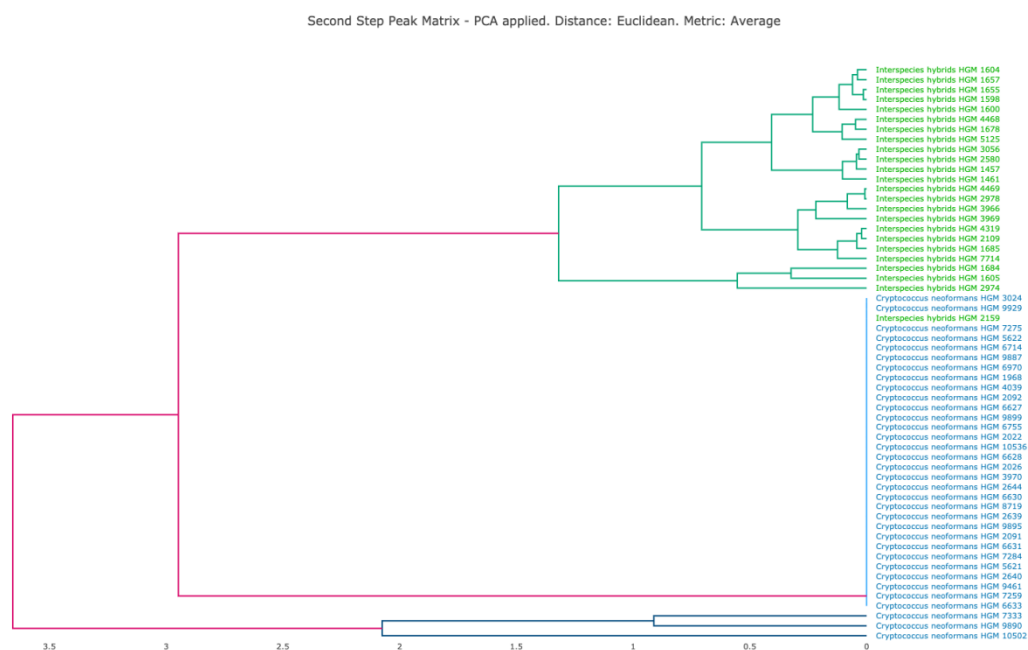

Figure S2. Discrimination between *C. neoformans* and the interspecies hybrids using the two-step classification method.
